# Supplementary material for: Glucagon‐like peptide‐1 receptor agonist inhibits aeroallergen‐induced activation of ILC2 and neutrophilic airway inflammation in obese mice
Source: PubMed Central journal article supplement — Allergy. 2021 May 18;76(11):3433–45. doi: 10.1111/all.14879 (PMC8597133; doi:10.1111/all.14879), 2021-05-18

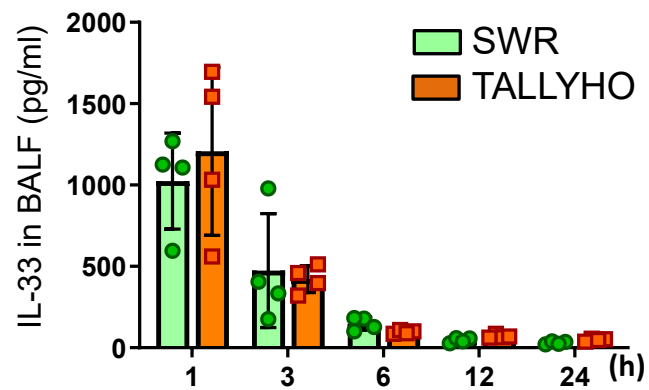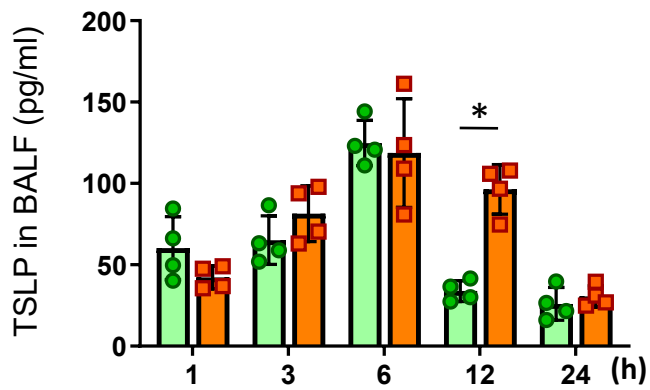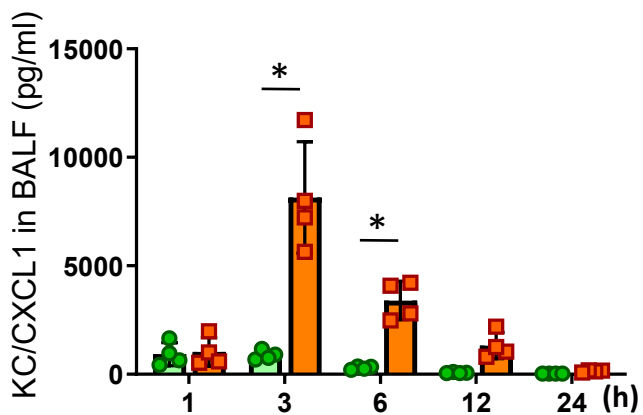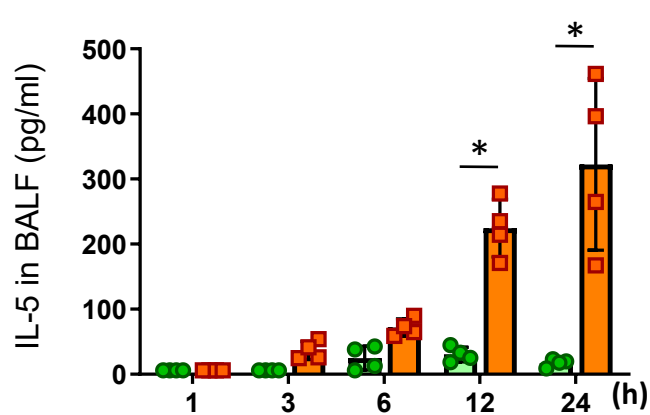

## ILC2 and ILC3 gating strategy

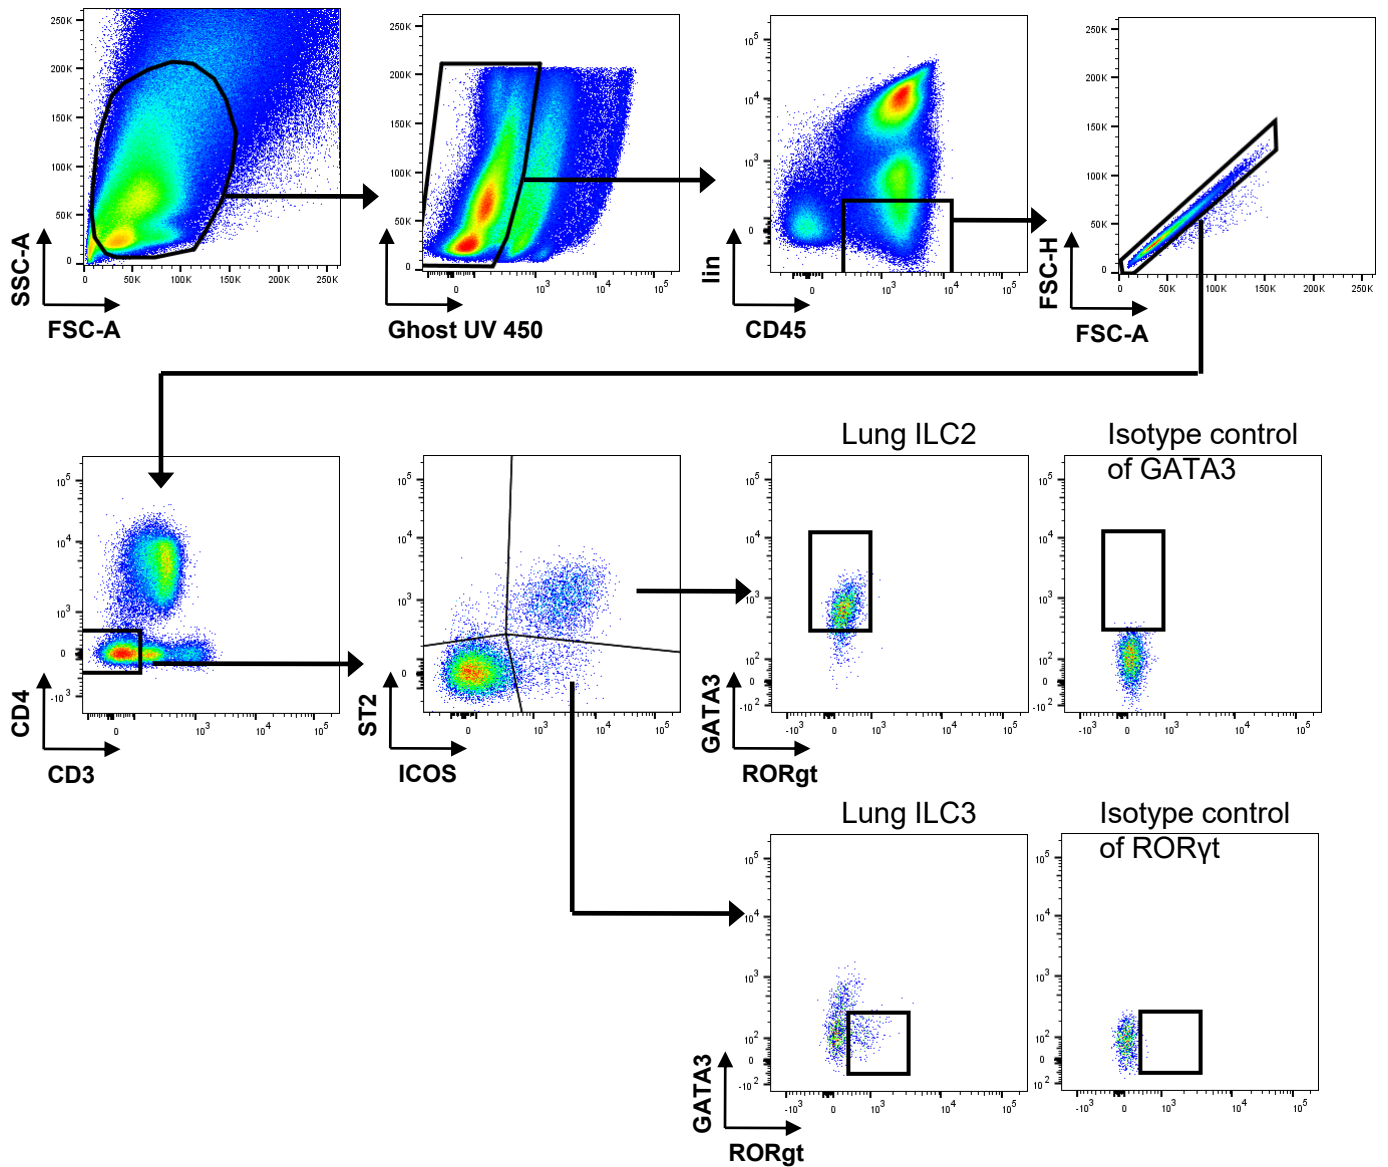

Figure S3.

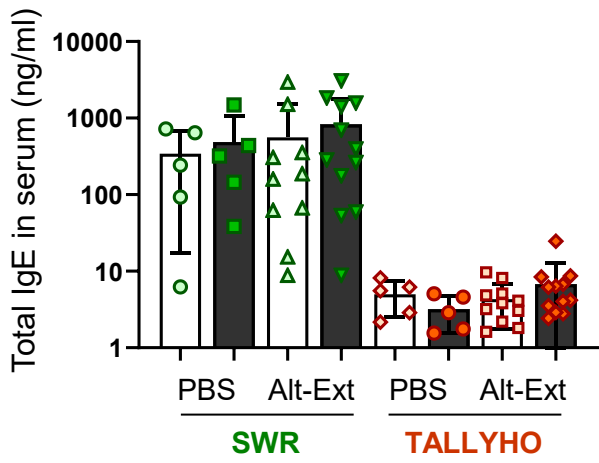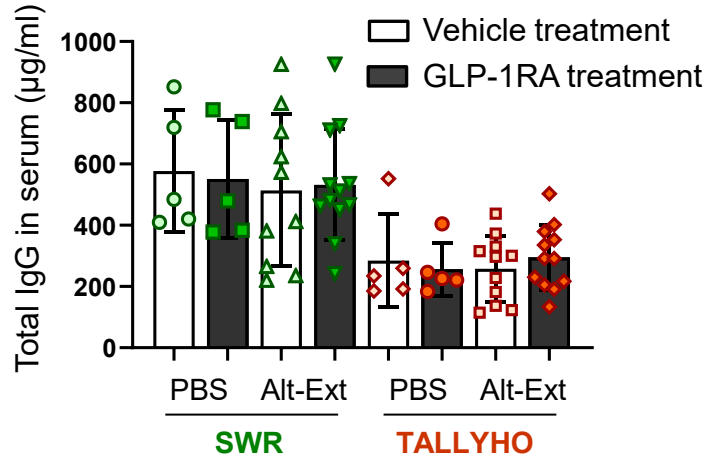

## Lung epithelial cells and endothelial cells gating strategy

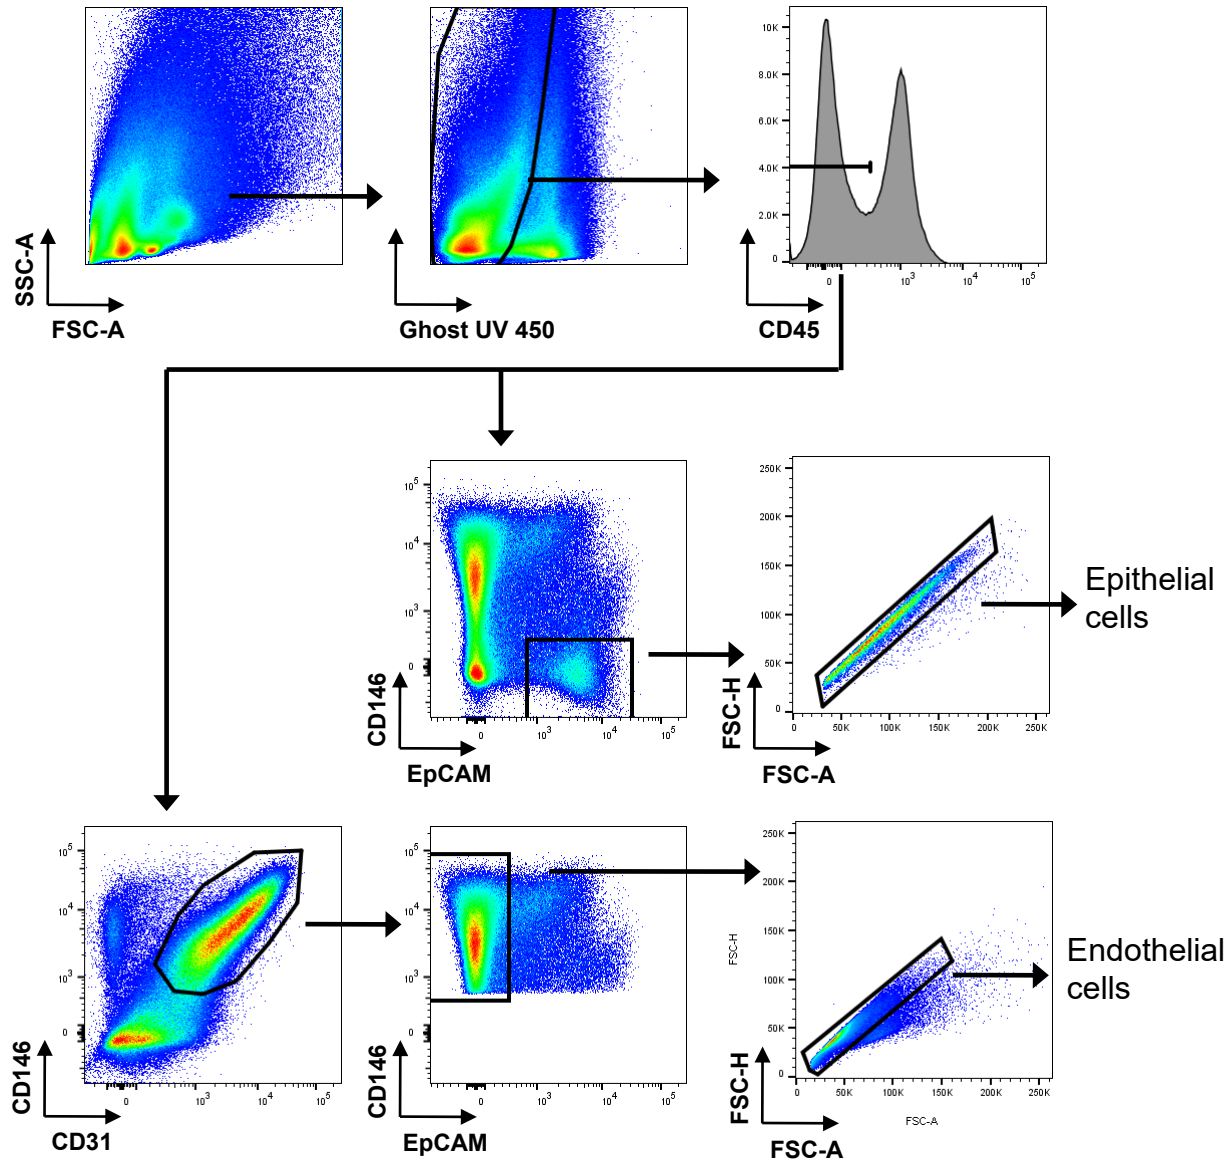

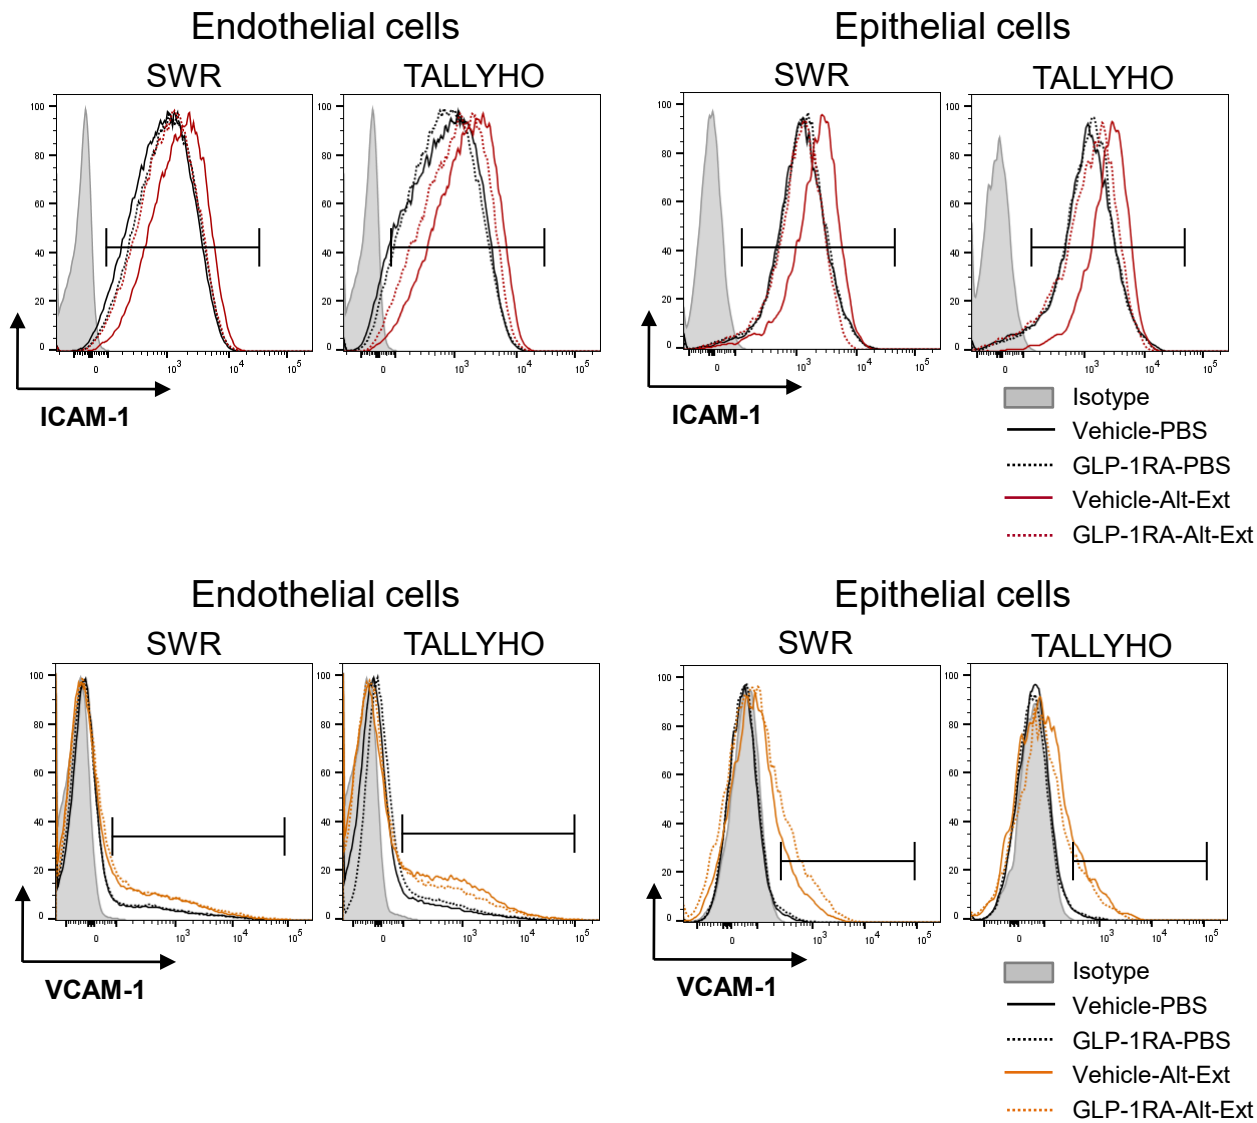

Supplement: ALL-76-3433-s002.pdf [file ALL-76-3433-s002.pdf]
